# Supplementary material for: Gap selection and steering during obstacle avoidance in pigeons
Source: Oxford University Press journal article supplement (doi:10.1242/jeb.244215), 2022-12-28
Supplement: jeb244215supp.pdf [file jeb244215supp.pdf]

**Dataset 1** contains the results of simulations treating the midpoint of the gap as the target of the bird's guidance.

[Click here to download Dataset 1](#)

**Dataset 2** contains results of simulations treating the point 0.35 m from the edge of the curtain as the target of the bird's guidance.

[Click here to download Dataset 2](#)
